# Supplementary material for: Air Pollution Inequality in the Denver Metroplex and its Relationship to Historical Redlining
Source: PubMed Central journal article supplement — Environ Sci Technol. 2024 Feb 21;58(9):4226–36. doi: 10.1021/acs.est.3c03230 (PMC10919081; doi:10.1021/acs.est.3c03230), 2024-02-21

Supplemental Information for:

# Air pollution inequality in the Denver metroplex and its relationship to historical redlining

Alexander C. Bradley.<sup>1,2</sup>; Bart E. Croes<sup>2</sup>; Colin Harkins<sup>2,3</sup>; Brian C. McDonald<sup>3</sup>; and Joost A. de Gouw<sup>\*1,2</sup>

1. University of Colorado Boulder, Boulder, CO 80309, USA
2. Cooperative Institute for Research in Environmental Sciences, Boulder, CO 80309, USA
3. Chemical Sciences Laboratory, National Oceanic and Atmospheric Administration, Boulder, CO 80305, USA

\*Joost.deGouw@colorado.edu

Contents:

|                                                       |            |
|-------------------------------------------------------|------------|
| Figure S1. Pollution inequality based on income plots | page S2    |
| Table S2. Pollution inequality based on income table  | page S3    |
| Table S3. Redlined cities spearman coefficients       | page S3-S5 |
| Figure S4. FIVE weekend emissions plots               | page S6    |

**Figure S1.** Pollution inequality based on income plots:

Values for the fraction of low/mid/high income households were calculated using 2020 census data at the census tract level.  $\text{NO}_2$  tropospheric column averages were calculated using  $0.01^\circ \times 0.01^\circ$  physically oversampled TROPOMI data,  $\text{PM}_{2.5}$  surface concentration averages were calculated using a satellite-derived model produced by van Donkelaar et. al. Income brackets were determined following federal poverty guidelines for a family of 4 ( $\sim \$35,000$  / year) and an even split between the remaining population for mid and high income.

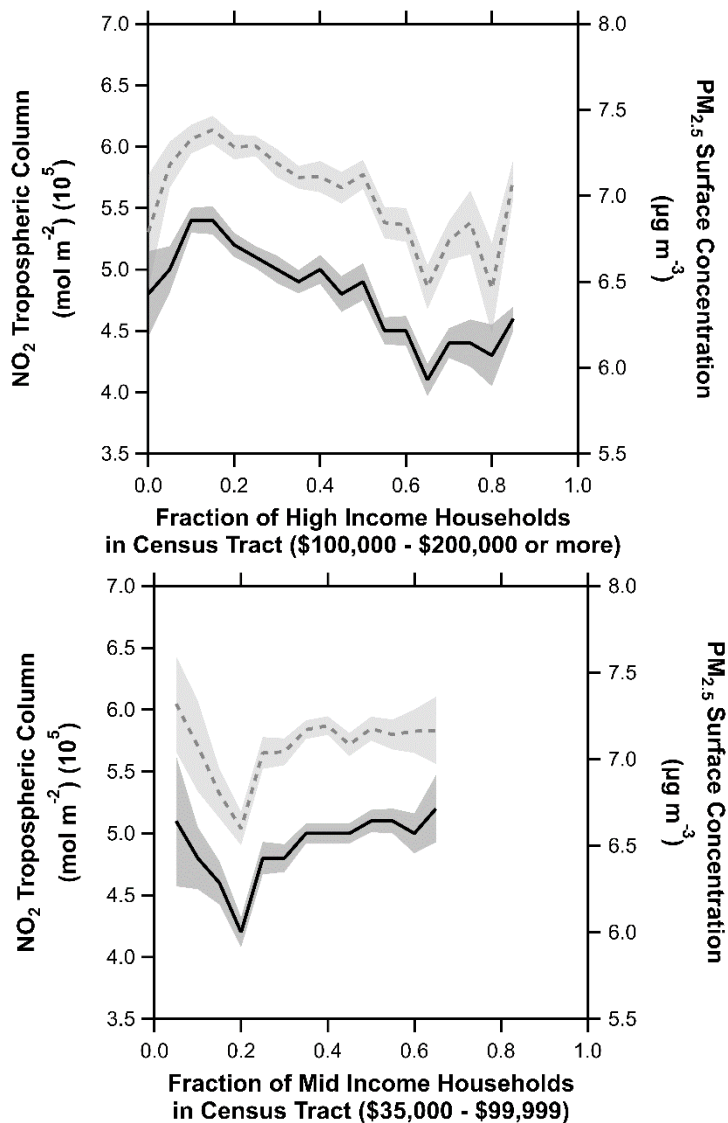

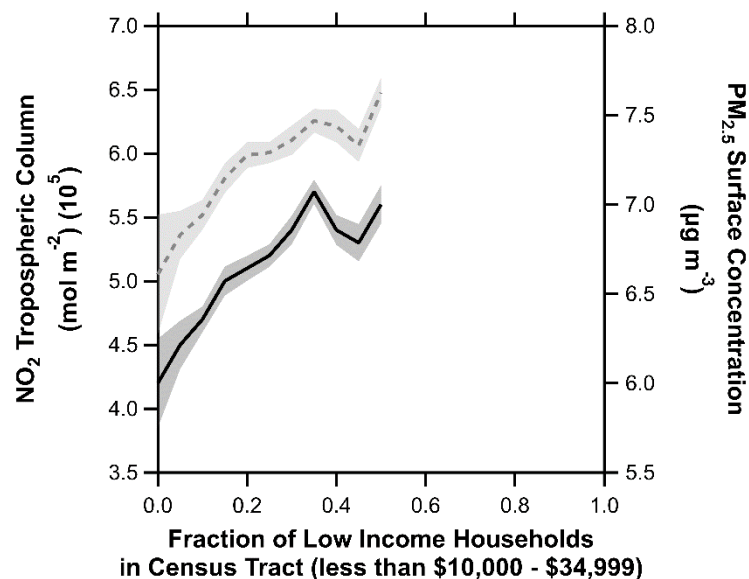

**Table S2.** Pollution inequality based on income table:

Spearman rank-order correlations were calculated for the low, mid, and high income groups described previously and summarized in the table below. Total household (Hshld) count and fraction of total are also presented.

| Income Level | Spearman Coefficients |                   | Pop. Stats  |              |
|--------------|-----------------------|-------------------|-------------|--------------|
|              | NO <sub>2</sub>       | PM <sub>2.5</sub> | Tot. Hshld. | Hshld. Frac. |
| Low          | 0.44                  | 0.39              | 190,336     | 18.8%        |
| Mid          | 0.19                  | 0.14              | 420,453     | 41.4%        |
| High         | -0.39                 | -0.32             | 403,755     | 39.8%        |

**Table S3.** Spearman coefficients for all redlined cities.

Spearman coefficients were calculated using NO<sub>2</sub> tropospheric column data for every city that underwent the practice of redlining. This distribution of this data is presented in **Figure 3** in the main text, but the authors believed the raw data would be of interest.

| Urbanized Area                     | Number of Census Tracts | NHW   | BAA   | AAA   | AIAN  | NHPI  | SOR   | TMR   | HL    |
|------------------------------------|-------------------------|-------|-------|-------|-------|-------|-------|-------|-------|
| Akron, OH                          | 103                     | -0.72 | 0.68  | 0.28  | 0.10  | -0.10 | 0.46  | 0.27  | 0.67  |
| Albany-Schenectady, NY             | 102                     | -0.25 | 0.32  | 0.18  | -0.11 | -0.15 | -0.19 | -0.26 | 0.08  |
| Altoona, PA                        | 13                      | 0.63  | -0.63 | 0.45  | -0.08 | -0.15 | -0.37 | -0.49 | -0.27 |
| Amarillo, TX                       | 38                      | -0.75 | 0.61  | 0.15  | 0.04  | -0.32 | 0.40  | -0.15 | 0.74  |
| Dallas-Fort Worth-Arlington, TX    | 1143                    | -0.21 | -0.03 | -0.06 | -0.14 | -0.13 | -0.01 | -0.30 | 0.16  |
| Asheville, NC                      | 16                      | -0.25 | 0.74  | 0.13  | -0.41 | 0.04  | 0.45  | -0.06 | -0.57 |
| Atlanta, GA                        | 1039                    | -0.37 | 0.47  | -0.36 | 0.06  | -0.08 | -0.17 | -0.26 | -0.29 |
| Atlantic City, NJ                  | 13                      | -0.74 | 0.46  | 0.04  | 0.33  | 0.32  | 0.38  | -0.23 | 0.43  |
| Chicago, IL-IN                     | 1850                    | -0.45 | 0.29  | -0.34 | 0.02  | -0.03 | -0.01 | -0.22 | 0.07  |
| Austin, TX                         | 225                     | 0.01  | 0.04  | -0.08 | -0.10 | 0.03  | -0.04 | -0.24 | -0.01 |
| Baltimore, MD                      | 477                     | -0.08 | 0.05  | -0.30 | 0.34  | -0.01 | -0.10 | 0.13  | 0.17  |
| Battle Creek, MI                   | 10                      | -0.66 | 0.67  | -0.59 | 0.43  | 0.50  | 0.79  | 0.59  | 0.77  |
| Bay City, MI                       | 9                       | -0.63 | 0.58  | -0.38 | 0.48  | 0.00  | 0.43  | 0.43  | 0.47  |
| Beaumont, TX                       | 22                      | -0.58 | 0.39  | -0.62 | -0.46 | 0.16  | -0.32 | -0.25 | 0.66  |
| Boston, MA-NH-RI                   | 786                     | -0.34 | 0.34  | 0.15  | 0.10  | 0.03  | 0.08  | 0.17  | 0.24  |
| New York-Newark, NY-NJ-CT          | 4210                    | -0.30 | 0.10  | 0.19  | 0.13  | 0.14  | 0.29  | 0.27  | 0.05  |
| Allentown, PA-NJ                   | 81                      | -0.47 | 0.38  | -0.13 | 0.18  | 0.08  | 0.30  | -0.19 | 0.43  |
| Binghamton, NY-PA                  | 23                      | -0.56 | 0.53  | 0.35  | 0.51  | -0.16 | 0.04  | 0.02  | 0.52  |
| Birmingham, AL                     | 133                     | -0.15 | 0.12  | -0.01 | -0.15 | -0.13 | -0.12 | -0.11 | -0.11 |
| Buffalo, NY                        | 208                     | -0.77 | 0.78  | 0.48  | 0.14  | 0.10  | 0.42  | 0.15  | 0.59  |
| Philadelphia, PA-NJ-DE-MD          | 1172                    | -0.43 | 0.35  | -0.05 | 0.13  | 0.03  | 0.20  | -0.08 | 0.27  |
| Canton, OH                         | 48                      | -0.61 | 0.65  | -0.37 | 0.40  | -0.05 | 0.58  | 0.43  | 0.52  |
| Charleston, WV                     | 17                      | -0.62 | 0.68  | -0.36 | 0.22  | -0.02 | 0.56  | 0.55  | 0.06  |
| Charlotte, NC-SC                   | 274                     | -0.37 | 0.43  | -0.15 | 0.08  | 0.03  | -0.20 | -0.35 | 0.09  |
| Chattanooga, TN-GA                 | 50                      | -0.60 | 0.60  | -0.36 | 0.05  | -0.08 | 0.06  | -0.43 | 0.31  |
| Cleveland, OH                      | 446                     | -0.58 | 0.53  | -0.24 | 0.18  | -0.04 | 0.15  | -0.06 | 0.11  |
| Columbia, SC                       | 90                      | 0.10  | -0.07 | -0.06 | -0.31 | -0.28 | -0.30 | -0.15 | -0.22 |
| Columbus, GA-AL                    | 46                      | -0.69 | 0.72  | -0.54 | -0.13 | -0.02 | -0.06 | -0.47 | -0.38 |
| Columbus, OH                       | 311                     | -0.51 | 0.60  | -0.51 | 0.25  | 0.04  | 0.25  | 0.26  | 0.25  |
| Omaha, NE-IA                       | 177                     | -0.35 | 0.02  | -0.48 | 0.43  | 0.09  | 0.12  | -0.09 | 0.71  |
| Cincinnati, OH-KY-IN               | 320                     | -0.20 | 0.28  | -0.25 | -0.04 | -0.23 | 0.08  | -0.02 | -0.11 |
| Dallas-Fort Worth-Arlington, TX    | 1143                    | -0.21 | -0.03 | -0.06 | -0.14 | -0.13 | -0.01 | -0.30 | 0.16  |
| Davenport, IA-IL                   | 58                      | -0.34 | 0.16  | -0.01 | -0.28 | 0.07  | 0.12  | -0.19 | 0.42  |
| Dayton, OH                         | 129                     | -0.14 | 0.13  | -0.09 | 0.36  | 0.21  | 0.21  | 0.46  | 0.42  |
| Decatur, IL                        | 17                      | -0.42 | 0.35  | -0.23 | -0.10 | 0.24  | -0.19 | 0.16  | 0.30  |
| Denver-Aurora, CO                  | 530                     | -0.22 | 0.16  | -0.39 | 0.34  | -0.12 | -0.02 | -0.33 | 0.31  |
| Des Moines, IA                     | 69                      | -0.60 | 0.57  | 0.13  | 0.41  | 0.10  | -0.01 | 0.43  | 0.57  |
| Detroit, MI                        | 1051                    | -0.46 | 0.45  | -0.51 | 0.14  | -0.04 | 0.14  | -0.09 | -0.19 |
| Dubuque, IA-IL                     | 11                      | -0.41 | 0.56  | -0.42 | 0.13  | -0.08 | 0.17  | 0.28  | 0.56  |
| Duluth, MN-WI                      | 17                      | -0.49 | 0.42  | 0.52  | 0.54  | 0.08  | 0.31  | 0.49  | 0.03  |
| Durham, NC                         | 53                      | -0.49 | 0.63  | -0.50 | -0.11 | 0.07  | -0.13 | -0.35 | 0.14  |
| St. Louis, MO-IL                   | 415                     | -0.63 | 0.63  | -0.26 | 0.09  | -0.13 | 0.22  | -0.32 | -0.11 |
| El Paso, TX-NM                     | 107                     | -0.60 | -0.45 | -0.58 | -0.07 | -0.11 | -0.35 | -0.64 | 0.62  |
| Elmira, NY                         | 2                       | 1.00  | -1.00 | 1.00  | -1.00 | 0.00  | 1.00  | -1.00 | -1.00 |
| Evansville, IN-KY                  | 32                      | 0.05  | -0.10 | 0.35  | -0.16 | 0.09  | 0.06  | -0.21 | -0.07 |
| Flint, MI                          | 68                      | 0.18  | -0.21 | 0.47  | 0.07  | -0.06 | 0.09  | 0.47  | 0.33  |
| Fort Wayne, IN                     | 59                      | 0.27  | -0.22 | -0.02 | 0.04  | -0.07 | 0.07  | 0.10  | -0.32 |
| Fresno, CA                         | 127                     | -0.51 | 0.29  | -0.35 | 0.30  | -0.10 | -0.19 | -0.57 | 0.67  |
| Grand Rapids, MI                   | 97                      | -0.31 | 0.09  | 0.29  | -0.03 | -0.06 | -0.06 | -0.13 | 0.40  |
| Greensboro, NC                     | 60                      | -0.29 | 0.29  | -0.38 | 0.16  | 0.28  | -0.22 | -0.05 | 0.21  |
| Harrisburg, PA                     | 62                      | -0.29 | 0.20  | -0.13 | 0.04  | 0.10  | 0.24  | -0.03 | 0.39  |
| Hartford, CT                       | 168                     | -0.46 | 0.43  | -0.01 | 0.19  | -0.11 | 0.23  | -0.44 | 0.42  |
| Springfield, MA-CT                 | 87                      | -0.40 | 0.64  | -0.07 | 0.24  | 0.05  | 0.30  | -0.15 | 0.32  |
| Huntington, WV-KY-OH               | 33                      | -0.31 | 0.31  | -0.18 | 0.26  | 0.01  | 0.01  | 0.27  | 0.25  |
| Indianapolis, IN                   | 271                     | -0.28 | 0.28  | -0.59 | 0.28  | -0.09 | 0.09  | 0.17  | 0.37  |
| Jackson, MI                        | 13                      | -0.76 | 0.70  | -0.32 | 0.47  | -0.41 | 0.14  | 0.37  | 0.23  |
| Jackson, MS                        | 48                      | -0.43 | 0.42  | -0.54 | 0.21  | 0.07  | -0.19 | -0.11 | -0.25 |
| Johnstown, PA                      | 9                       | -0.25 | 0.30  | 0.42  | 0.27  | 0.01  | -0.07 | -0.22 | 0.20  |
| Kalamazoo, MI                      | 38                      | -0.02 | -0.04 | -0.53 | 0.34  | 0.04  | -0.05 | 0.27  | 0.45  |
| Kansas City, MO-KS                 | 333                     | -0.43 | 0.39  | -0.25 | 0.04  | 0.02  | 0.00  | -0.22 | 0.25  |
| Kenosha, WI-IL                     | 24                      | 0.37  | -0.19 | 0.27  | -0.05 | -0.15 | -0.21 | -0.57 | -0.33 |
| Knoxville, TN                      | 82                      | -0.48 | 0.62  | 0.02  | 0.23  | -0.08 | 0.11  | 0.11  | 0.12  |
| Lancaster, PA                      | 34                      | -0.67 | 0.64  | -0.15 | 0.22  | -0.01 | 0.38  | 0.34  | 0.69  |
| Lansing, MI                        | 69                      | -0.35 | 0.21  | -0.44 | 0.32  | 0.11  | 0.30  | 0.62  | 0.57  |
| Lexington-Fayette, KY              | 55                      | -0.31 | 0.34  | -0.50 | 0.23  | -0.07 | 0.06  | 0.02  | 0.23  |
| Lima, OH                           | 15                      | -0.38 | 0.33  | -0.55 | -0.01 | -0.50 | 0.11  | 0.31  | 0.02  |
| Lincoln, NE                        | 54                      | -0.51 | 0.59  | 0.17  | 0.71  | 0.18  | 0.39  | 0.37  | 0.57  |
| Little Rock, AR                    | 51                      | -0.32 | 0.41  | -0.41 | 0.12  | 0.18  | 0.07  | 0.09  | -0.02 |
| Lorain-Elyria, OH                  | 28                      | 0.42  | -0.05 | 0.32  | -0.05 | 0.10  | 0.27  | 0.30  | -0.56 |
| Los Angeles-Long Beach-Anaheim, CA | 2769                    | -0.62 | 0.02  | -0.16 | 0.03  | -0.13 | -0.24 | -0.53 | 0.48  |
| Louisville/Jefferson County, KY-IN | 213                     | -0.06 | 0.00  | 0.15  | 0.06  | 0.16  | 0.17  | -0.20 | 0.00  |
| Lynchburg, VA                      | 19                      | -0.30 | 0.49  | -0.28 | 0.14  | 0.14  | -0.35 | 0.53  | 0.06  |
| Macon, GA                          | 21                      | -0.12 | 0.05  | -0.17 | 0.18  | 0.04  | -0.03 | 0.11  | 0.22  |
| Madison, WI                        | 52                      | 0.08  | -0.15 | -0.11 | 0.19  | 0.11  | 0.00  | 0.17  | -0.16 |

| Urbanized Area                       | Number of Census Tracts | NHW   | BAA   | AAA   | AIAN  | NHPI  | SOR   | TMR   | HL    |
|--------------------------------------|-------------------------|-------|-------|-------|-------|-------|-------|-------|-------|
| Manchester, NH                       | 26                      | 0.27  | -0.17 | 0.14  | -0.14 | -0.13 | -0.28 | -0.30 | -0.32 |
| Medford, OR                          | 11                      | -0.17 | -0.16 | 0.37  | 0.01  | 0.62  | 0.17  | 0.57  | 0.16  |
| Memphis, TN--MS--AR                  | 203                     | -0.47 | 0.40  | -0.34 | -0.05 | -0.17 | -0.18 | -0.41 | -0.07 |
| Miami, FL                            | 1283                    | -0.55 | -0.15 | -0.29 | -0.12 | -0.14 | -0.16 | -0.37 | 0.47  |
| Milwaukee, WI                        | 336                     | -0.46 | 0.38  | -0.23 | 0.27  | -0.01 | 0.24  | 0.01  | 0.35  |
| Minneapolis--St. Paul, MN--WI        | 590                     | -0.24 | 0.19  | -0.18 | 0.35  | 0.14  | 0.17  | 0.16  | 0.37  |
| Mobile, AL                           | 71                      | -0.34 | 0.37  | -0.56 | -0.24 | -0.01 | -0.12 | -0.33 | -0.38 |
| Montgomery, AL                       | 33                      | -0.26 | 0.33  | -0.73 | 0.00  | -0.31 | -0.38 | -0.20 | -0.19 |
| Muncie, IN                           | 14                      | -0.10 | 0.17  | -0.72 | 0.12  | -0.43 | 0.13  | 0.42  | -0.42 |
| Muskegon, MI                         | 14                      | 0.18  | -0.23 | 0.29  | 0.56  | -0.17 | -0.25 | -0.03 | -0.07 |
| Nashville-Davidson, TN               | 169                     | -0.40 | 0.41  | -0.28 | 0.22  | 0.00  | 0.15  | -0.06 | 0.26  |
| Hartford, CT                         | 168                     | -0.46 | 0.43  | -0.01 | 0.19  | -0.11 | 0.23  | -0.44 | 0.42  |
| New Haven, CT                        | 79                      | -0.28 | 0.32  | 0.23  | 0.21  | 0.04  | 0.09  | -0.10 | 0.14  |
| New Orleans, LA                      | 276                     | 0.39  | -0.29 | 0.01  | 0.09  | 0.05  | -0.17 | 0.23  | 0.08  |
| Virginia Beach, VA                   | 308                     | -0.17 | 0.19  | -0.20 | 0.06  | -0.16 | -0.03 | -0.26 | -0.06 |
| San Francisco--Oakland, CA           | 671                     | -0.30 | 0.41  | -0.06 | 0.28  | 0.39  | -0.21 | -0.11 | 0.25  |
| Ogden--Layton, UT                    | 69                      | 0.18  | 0.05  | 0.19  | -0.02 | 0.48  | 0.17  | 0.24  | -0.27 |
| Oklahoma City, OK                    | 231                     | -0.44 | 0.08  | -0.34 | 0.19  | -0.14 | -0.11 | -0.24 | 0.29  |
| Omaha, NE--IA                        | 177                     | -0.35 | 0.02  | -0.48 | 0.43  | 0.09  | 0.12  | -0.09 | 0.71  |
| Oshkosh, WI                          | 9                       | -0.43 | 0.32  | 0.62  | 0.15  | 0.00  | 0.44  | 0.48  | -0.47 |
| Providence, RI--MA                   | 179                     | -0.48 | 0.39  | 0.20  | 0.26  | 0.04  | 0.14  | -0.13 | 0.43  |
| Peoria, IL                           | 34                      | -0.51 | 0.51  | -0.27 | 0.14  | -0.05 | 0.30  | 0.15  | 0.41  |
| Philadelphia, PA--NJ--DE--MD         | 1172                    | -0.43 | 0.35  | -0.05 | 0.13  | 0.03  | 0.20  | -0.08 | 0.27  |
| Phoenix--Mesa, AZ                    | 753                     | -0.63 | 0.49  | -0.18 | 0.45  | -0.07 | 0.08  | -0.29 | 0.61  |
| Pittsburgh, PA                       | 386                     | -0.46 | 0.39  | 0.06  | 0.08  | -0.02 | 0.25  | 0.15  | 0.33  |
| Detroit, MI                          | 1051                    | -0.46 | 0.45  | -0.51 | 0.14  | -0.04 | 0.14  | -0.09 | -0.19 |
| Port Arthur, TX                      | 23                      | -0.32 | 0.28  | -0.14 | -0.51 | 0.04  | -0.12 | -0.46 | 0.00  |
| Portland, OR--WA                     | 377                     | 0.10  | 0.19  | -0.28 | 0.01  | -0.16 | 0.26  | 0.30  | -0.10 |
| Poughkeepsie--Newburgh, NY--NJ       | 49                      | -0.25 | 0.04  | -0.20 | 0.04  | 0.05  | -0.12 | -0.43 | 0.45  |
| Providence, RI--MA                   | 179                     | -0.48 | 0.39  | 0.20  | 0.26  | 0.04  | 0.14  | -0.13 | 0.43  |
| Pueblo, CO                           | 25                      | -0.42 | 0.24  | -0.14 | 0.62  | -0.11 | 0.07  | 0.38  | 0.38  |
| Racine, WI                           | 16                      | 0.51  | -0.45 | 0.44  | 0.32  | -0.02 | 0.02  | -0.24 | -0.64 |
| Richmond, VA                         | 182                     | -0.32 | 0.41  | -0.45 | 0.00  | -0.12 | 0.00  | -0.06 | -0.18 |
| Roanoke, VA                          | 34                      | -0.67 | 0.70  | -0.33 | 0.32  | 0.15  | 0.33  | 0.44  | 0.58  |
| Rochester, MN                        | 12                      | 0.01  | -0.31 | 0.06  | -0.15 | 0.27  | -0.01 | -0.33 | 0.15  |
| Rochester, NY                        | 153                     | -0.51 | 0.57  | -0.13 | 0.18  | 0.00  | 0.19  | 0.17  | 0.56  |
| Rockford, IL                         | 55                      | 0.01  | -0.13 | 0.52  | -0.10 | -0.12 | 0.07  | 0.02  | 0.27  |
| Sacramento, CA                       | 336                     | -0.44 | 0.42  | 0.18  | 0.11  | 0.30  | 0.13  | -0.12 | 0.49  |
| Saginaw, MI                          | 23                      | -0.80 | 0.78  | -0.51 | -0.38 | -0.09 | -0.09 | 0.06  | 0.11  |
| Salt Lake City--West Valley City, UT | 203                     | -0.54 | 0.68  | 0.30  | 0.62  | 0.38  | 0.24  | 0.17  | 0.50  |
| San Antonio, TX                      | 328                     | -0.45 | -0.31 | -0.52 | -0.04 | -0.32 | -0.20 | -0.55 | 0.47  |
| San Diego, CA                        | 585                     | -0.46 | 0.67  | 0.06  | 0.18  | 0.39  | -0.19 | -0.24 | 0.51  |
| San Francisco--Oakland, CA           | 671                     | -0.30 | 0.41  | -0.06 | 0.28  | 0.39  | -0.21 | -0.11 | 0.25  |
| San Jose, CA                         | 332                     | -0.50 | 0.40  | -0.16 | 0.31  | 0.32  | -0.14 | -0.48 | 0.61  |
| Savannah, GA                         | 39                      | -0.30 | 0.30  | -0.27 | 0.12  | -0.44 | -0.22 | -0.51 | -0.17 |
| Seattle, WA                          | 627                     | -0.17 | 0.40  | -0.19 | 0.36  | 0.33  | 0.03  | 0.17  | 0.27  |
| Shreveport, LA                       | 45                      | -0.24 | 0.21  | -0.45 | 0.00  | -0.20 | -0.21 | -0.04 | -0.25 |
| Sioux City, IA--NE--SD               | 9                       | 0.02  | -0.22 | -0.47 | -0.30 | 0.40  | 0.30  | 0.55  | -0.15 |
| South Bend, IN--MI                   | 59                      | -0.60 | 0.62  | -0.28 | -0.16 | -0.26 | 0.10  | 0.19  | 0.59  |
| Spokane, WA                          | 71                      | -0.43 | 0.37  | -0.01 | 0.51  | 0.23  | 0.31  | 0.27  | 0.28  |
| Springfield, IL                      | 33                      | -0.45 | 0.47  | -0.52 | 0.14  | 0.24  | 0.29  | 0.53  | 0.32  |
| Springfield, MO                      | 46                      | 0.16  | -0.12 | 0.27  | -0.07 | -0.09 | 0.14  | -0.29 | -0.26 |
| Springfield, OH                      | 15                      | 0.25  | -0.25 | 0.32  | 0.46  | -0.07 | -0.01 | 0.10  | -0.51 |
| St. Joseph, MO--KS                   | 12                      | -0.06 | -0.28 | -0.74 | 0.02  | -0.17 | -0.24 | 0.30  | 0.38  |
| Minneapolis--St. Paul, MN--WI        | 590                     | -0.24 | 0.19  | -0.18 | 0.35  | 0.14  | 0.17  | 0.16  | 0.37  |
| Tampa--St. Petersburg, FL            | 482                     | -0.71 | 0.59  | 0.08  | -0.07 | -0.03 | 0.30  | -0.15 | 0.63  |
| Stockton, CA                         | 68                      | 0.01  | 0.07  | -0.59 | 0.22  | -0.59 | 0.13  | -0.07 | 0.43  |
| Syracuse, NY                         | 83                      | -0.15 | 0.14  | 0.45  | 0.01  | 0.05  | 0.07  | 0.05  | 0.13  |
| Terre Haute, IN                      | 11                      | -0.20 | 0.19  | -0.30 | -0.12 | -0.12 | 0.25  | 0.01  | -0.15 |
| Toledo, OH--MI                       | 147                     | -0.54 | 0.43  | -0.63 | 0.26  | 0.00  | 0.08  | 0.42  | 0.59  |
| Topeka, KS                           | 25                      | -0.31 | 0.30  | -0.30 | 0.17  | 0.29  | 0.34  | 0.17  | 0.32  |
| Trenton, NJ                          | 43                      | -0.19 | 0.16  | -0.14 | 0.12  | -0.09 | -0.28 | 0.04  | 0.06  |
| Albany--Schenectady, NY              | 102                     | -0.25 | 0.32  | 0.18  | -0.11 | -0.15 | -0.19 | -0.26 | 0.08  |
| Tulsa, OK                            | 138                     | -0.23 | 0.25  | 0.01  | 0.05  | 0.13  | 0.15  | -0.10 | 0.40  |
| Utica, NY                            | 30                      | -0.35 | 0.16  | 0.64  | -0.36 | 0.06  | 0.20  | 0.12  | 0.20  |
| Waco, TX                             | 18                      | -0.39 | 0.29  | -0.60 | -0.42 | -0.52 | 0.23  | -0.05 | 0.24  |
| Youngstown, OH--PA                   | 75                      | -0.66 | 0.65  | -0.23 | 0.22  | 0.04  | 0.21  | -0.05 | 0.74  |
| Waterbury, CT                        | 30                      | -0.43 | 0.27  | 0.03  | 0.39  | 0.03  | 0.20  | 0.18  | 0.44  |
| Waterloo, IA                         | 17                      | -0.53 | 0.50  | 0.52  | 0.09  | 0.41  | 0.19  | 0.03  | 0.47  |
| Wheeling, WV--OH                     | 8                       | -0.19 | 0.02  | -0.50 | 0.33  | -0.26 | 0.38  | 0.45  | -0.10 |
| Wichita, KS                          | 88                      | -0.65 | 0.54  | -0.02 | 0.07  | 0.19  | 0.18  | 0.17  | 0.58  |
| Scranton, PA                         | 63                      | 0.05  | -0.20 | 0.46  | 0.08  | -0.11 | 0.21  | -0.17 | -0.16 |
| Winston-Salem, NC                    | 61                      | -0.67 | 0.67  | -0.55 | 0.11  | -0.12 | -0.25 | -0.17 | 0.44  |
| York, PA                             | 34                      | -0.59 | 0.53  | -0.19 | 0.17  | 0.15  | 0.30  | 0.35  | 0.61  |
| Youngstown, OH--PA                   | 75                      | -0.66 | 0.65  | -0.23 | 0.22  | 0.04  | 0.21  | -0.05 | 0.74  |

**Figure S4.** FIVE weekend emission plots

Weekend emissions map and plots for non-Hispanic white (top) and Hispanic or Latino (bottom) racial and ethnic groups. NOx emissions were obtained from the Fuel-based Inventory of Vehicle Emissions (FIVE).

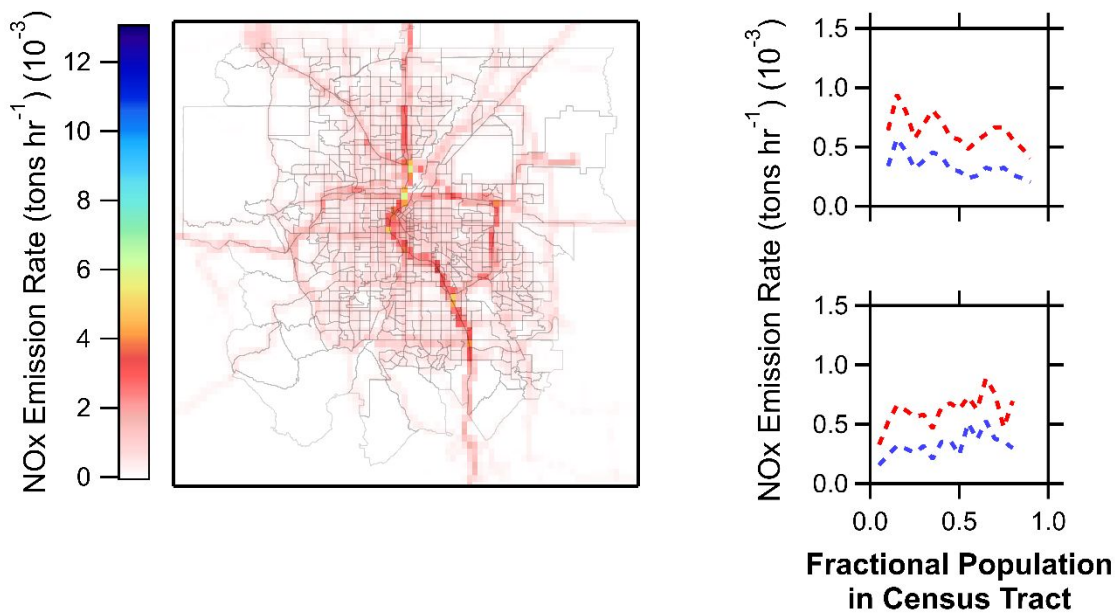

Supplement: es3c03230_si_001.pdf [file es3c03230_si_001.pdf]
